# Supplementary material
Source: HighWire-hosted journal article supplement (https://www.cancerbiomed.org/content/19/6/850)
Supplement: media-1 [file media-1.pdf]

## Supplementary materials

**Table S1** The clinicopathological data and mutation information of 47 familial breast cancer patients

| Sample ID | Age | Gender | Axillary lymph node metastasis | TNM Stage | Luminal Type | Histological Grade | Mutation                   |
|-----------|-----|--------|--------------------------------|-----------|--------------|--------------------|----------------------------|
| B00010    | 40  | Female | Yes                            | III       | 4            | II                 | <i>BRCA1</i> p.Ile1824fs   |
| B00011    | 40  | Female | Yes                            | III       | 4            | II                 | <i>BRCA1</i> p.Ile1824fs   |
| B00014    | 45  | Female | Yes                            | III       | 4            | II                 |                            |
| B00015    | 31  | Female | No                             | II        | 2            | II                 | <i>PTEN</i> p.352_352del   |
| B00018    | 51  | Female | No                             | I         | 1            | I                  |                            |
| B00057    | 56  | Female | No                             | II        | 2            | III                | <i>PALB2</i> p.Leu253fs    |
| B00064    | 40  | Female | Yes                            | III       | 2            | II                 |                            |
| B00068    | 51  | Female | No                             | I         | 1            | I                  |                            |
| B00071    | 61  | Female | No                             | II        | 2            | III                |                            |
| B00072    | 26  | Female | Yes                            | III       | 4            | II                 | <i>BRCA2</i> p.Val2050fs   |
| B00073    | 41  | Female | No                             | I         | 3            | III                |                            |
| B00081    | 46  | Female | Yes                            | III       | 3            | III                | <i>CHEK2</i> p.Arg180Cys   |
| B00084    | 44  | Female | No                             | I         | 2            | I                  |                            |
| B00086    | 50  | Female | No                             | I         | 1            | II                 |                            |
| B00091    | 59  | Female | No                             | I         | 1            | II                 |                            |
| B00100    | 49  | Female | No                             | I         | 1            | II                 |                            |
| B00107    | 42  | Female | No                             | I         | 2            | II                 |                            |
| B00110    | 44  | Female | No                             | I         | 4            | III                | <i>BRCA1</i> p.Cys47Term   |
| B00112    | 53  | Female | No                             | I         | 3            | III                |                            |
| B00116    | 48  | Female | Yes                            | III       | 2            | II                 |                            |
| B00122    | 55  | Female | No                             | I         | 2            | I                  |                            |
| B00125    | 52  | Female | No                             | II        | 3            | II                 | <i>BRCA1</i> p.Glu1527Met  |
| B00127    | 51  | Female | Yes                            | III       | 1            | II                 | <i>BRCA2</i> p.Gln1295Term |
| B00130    | 76  | Female | Yes                            | II        | 1            | II                 |                            |
| B00135    | 49  | Female | No                             | II        | 1            | II                 |                            |
| B00138    | 44  | Female | No                             | II        | 1            | II                 | <i>PMS2</i> p.Arg169His    |
| B00139    | 58  | Female | Yes                            | II        | 3            | II                 |                            |
| B00140    | 71  | Female | No                             | I         | 1            | I                  |                            |
| B00141    | 59  | Female | No                             | I         | 2            | II                 |                            |
| B00244    | 59  | Female | No                             | II        | 3            | III                | <i>BRCA1</i> p.Ser1841fs   |
| B00257    | 34  | Female | No                             | II        | 2            | II                 |                            |
| B00260    | 62  | Female | No                             | I         | 4            | II                 |                            |
| B00264    | 54  | Female | No                             | I         | 1            | II                 |                            |

Table S1 Continued

| Sample ID | Age | Gender | Axillary lymph node metastasis | TNM Stage | Luminal Type | Histological Grade | Mutation                                             |
|-----------|-----|--------|--------------------------------|-----------|--------------|--------------------|------------------------------------------------------|
| B00266    | 56  | Female | No                             | II        | 2            | II                 | <i>CHEK2</i> p.Gln439Term; <i>BARD1</i> p.359_365del |
| B00269    | 60  | Female | Yes                            | III       | 2            | III                |                                                      |
| B00278    | 59  | Female | Yes                            | III       | 1            | II                 | <i>BRCA1</i> p.Leu481fs                              |
| B00285    | 59  | Female | No                             | II        | 1            | I                  |                                                      |
| B00289    | 47  | Female | No                             | I         | 2            | III                |                                                      |
| B00290    | 53  | Female | Yes                            | II        | 1            | II                 |                                                      |
| B00291    | 49  | Female | No                             | I         | 1            | II                 |                                                      |
| B00292    | 52  | Female | No                             | I         | 2            | II                 |                                                      |
| B00293    | 57  | Female | No                             | I         | 3            | II                 |                                                      |
| B00294    | 47  | Female | Yes                            | III       | 4            | II                 |                                                      |
| B00296    | 40  | Female | Yes                            | III       | 2            | III                | <i>BRCA2</i> p.Trp2990Term                           |
| B00297    | 56  | Female | Yes                            | III       | 4            | II                 | <i>BRCA1</i> p.Ser1363Leu                            |
| B00316    | 43  | Female | No                             | I         | 2            | II                 | <i>BRCA2</i> p.Ile2822fs                             |
| B00328    | 37  | Female | Yes                            | III       | 2            | II                 |                                                      |

Note: Luminal Type: 1 = Luminal A; 2 = Luminal B; 3 = HER2 overexpressing; 4 = Triple negative

Table S2 List of mutations

| Family ID | Sample ID     | Gene          | NM           | Exon   | Genome             | AA_change   |
|-----------|---------------|---------------|--------------|--------|--------------------|-------------|
| F01       | B00162_190213 | <i>MSH2</i>   | NM_000251    | exon1  | c.23C>T            | p.Thr8Met   |
| F01       | B00162_190213 | <i>BRCA2</i>  | NM_000059    | exon3  | c.289G>T           | p.Glu97Term |
| F01       | B00162_190213 | <i>BRCA2</i>  | NM_000059    | exon11 | c.2519T>C          | p.Met840Thr |
| F01       | B00583_190213 | <i>BRCA2</i>  | NM_000059    | exon3  | c.289G>T           | p.Glu97Term |
| F01       | B00584_190213 | <i>RAD50</i>  | NM_005732    | exon8  | c.1211A>G          | p.Gln404Arg |
| F01       | B00584_190213 | <i>MSH2</i>   | NM_000251    | exon1  | c.23C>T            | p.Thr8Met   |
| F01       | B00584_190213 | <i>MRE11A</i> | NM_005591    | exon6  | c.469A>G           | p.Met157Val |
| F01       | B00585_190213 | <i>RAD50</i>  | NM_005732    | exon8  | c.1211A>G          | p.Gln404Arg |
| F01       | B00585_190213 | <i>MSH6</i>   | NM_000179    | exon10 | c.4065_4066insTTGA | p.Thr1355fs |
| F01       | B00585_190213 | <i>MSH2</i>   | NM_000251    | exon1  | c.23C>T            | p.Thr8Met   |
| F01       | B00585_190213 | <i>MRE11A</i> | NM_005591    | exon6  | c.469A>G           | p.Met157Val |
| F02       | B00662        | <i>BLM</i>    | NM_000057    | exon3  | c.178T>A           | p.Leu60Ile  |
| F02       | B00663        | <i>BLM</i>    | NM_000057    | exon3  | c.178T>A           | p.Leu60Ile  |
| F02       | B00663        | <i>FANCD2</i> | NM_001018115 | exon29 | c.2723C>T          | p.Thr908Ile |
| F02       | B00664        | <i>BLM</i>    | NM_000057    | exon3  | c.178T>A           | p.Leu60Ile  |
| F02       | B00665        | <i>BLM</i>    | NM_000057    | exon3  | c.178T>A           | p.Leu60Ile  |
| F02       | B00666        | <i>BLM</i>    | NM_000057    | exon3  | c.178T>A           | p.Leu60Ile  |

Table S2 Continued

| Family ID | Sample ID     | Gene          | NM           | Exon   | Genome         | AA_change    |
|-----------|---------------|---------------|--------------|--------|----------------|--------------|
| F03       | B00672        | <i>APC</i>    | NM_000038    | exon16 | c.5363G>A      | p.Arg1788His |
| F03       | B00672        | <i>CHEK2</i>  | NM_001005735 | exon7  | c.884G>A       | p.Ser295Asn  |
| F03       | B00672        | <i>BRIP1</i>  | NM_032043    | exon5  | c.430G>A       | p.Ala144Thr  |
| F03       | B00674        | <i>APC</i>    | NM_000038    | exon16 | c.5363G>A      | p.Arg1788His |
| F03       | B00674        | <i>NBN</i>    | NM_002485    | exon11 | c.1690G>A      | p.Glu564Lys  |
| F03       | B00674        | <i>BRIP1</i>  | NM_032043    | exon5  | c.430G>A       | p.Ala144Thr  |
| F03       | B00675        | <i>FANCD2</i> | NM_001018115 | exon6  | c.416T>C       | p.Leu139Pro  |
| F03       | B00675        | <i>APC</i>    | NM_000038    | exon16 | c.5363G>A      | p.Arg1788His |
| F03       | B00676        | <i>BRIP1</i>  | NM_032043    | exon5  | c.430G>A       | p.Ala144Thr  |
| F03       | B00676        | <i>APC</i>    | NM_000038    | exon16 | c.5363G>A      | p.Arg1788His |
| F03       | B00676        | <i>NBN</i>    | NM_002485    | exon11 | c.1690G>A      | p.Glu564Lys  |
| F03       | B00679        | <i>FANCD2</i> | NM_001018115 | exon6  | c.416T>C       | p.Leu139Pro  |
| F04       | B00557_190213 | <i>EPCAM</i>  | NM_002354    | exon4  | c.458G>C       | p.Arg153Thr  |
| F04       | B00557_190213 | <i>BRCA1</i>  | NM_007294    | exon23 | c.5566C>A      | p.Pro1856Thr |
| F04       | B00558_190213 | <i>FANCD2</i> | NM_001018115 | exon34 | c.3446C>T      | p.Ala1149Val |
| F04       | B00558_190213 | <i>EPCAM</i>  | NM_002354    | exon4  | c.458G>C       | p.Arg153Thr  |
| F05       | B00563_190228 | <i>MSH2</i>   | NM_000251    | exon13 | c.2064G>A      | p.Met688Ile  |
| F06       | B00571        | <i>STK11</i>  | NM_000455    | exon5  | c.608C>T       | p.Pro203Leu  |
| F06       | B00571        | <i>BLM</i>    | NM_000057    | exon15 | c.2839A>G      | p.Ile947Val  |
| F06       | B00572        | <i>STK11</i>  | NM_000455    | exon5  | c.608C>T       | p.Pro203Leu  |
| F06       | B00574        | <i>STK11</i>  | NM_000455    | exon5  | c.608C>T       | p.Pro203Leu  |
| F06       | B00574        | <i>BLM</i>    | NM_000057    | exon15 | c.2839A>G      | p.Ile947Val  |
| F06       | B00574        | <i>ATM</i>    | NM_000051    | exon3  | c.125A>G       | p.His42Arg   |
| F06       | B00579_190131 | <i>BLM</i>    | NM_000057    | exon15 | c.2839A>G      | p.Ile947Val  |
| F07       | B00592        | <i>RAD50</i>  | NM_005732    |        | IVS15+4A>T     |              |
| F07       | B00593        | <i>RAD50</i>  | NM_005732    |        | IVS15+4A>T     |              |
| F07       | B00593        | <i>BRIP1</i>  | NM_032043    | exon4  | c.370A>G       | p.Thr124Ala  |
| F07       | B00594        | <i>RAD50</i>  | NM_005732    |        | IVS15+4A>T     |              |
| F07       | B00594        | <i>BRIP1</i>  | NM_032043    | exon4  | c.370A>G       | p.Thr124Ala  |
| F07       | B00595        | <i>RAD50</i>  | NM_005732    |        | IVS15+4A>T     |              |
| F07       | B00595        | <i>BRCA2</i>  | NM_000059    | exon10 | c.1741T>C      | p.Ser581Pro  |
| F09       | B00645        | <i>BRCA1</i>  | NM_007294    | exon23 | c.5507_5508del | p.Glu1836fs  |
| F09       | B00645        | <i>BRIP1</i>  | NM_032043    | exon7  | c.664A>T       | p.Lys222Term |
| F09       | B00646        | <i>BRIP1</i>  | NM_032043    | exon7  | c.664A>T       | p.Lys222Term |
| F09       | B00646        | <i>BRCA1</i>  | NM_007294    | exon23 | c.5507_5508del | p.Glu1836fs  |

Table S2 Continued

| Family ID | Sample ID     | Gene          | NM           | Exon   | Genome         | AA_change     |
|-----------|---------------|---------------|--------------|--------|----------------|---------------|
| F09       | B00647        | <i>RAD51C</i> | NM_058216    | exon4  | c.635G>A       | p.Arg212His   |
| F09       | B00647        | <i>EPCAM</i>  | NM_002354    | exon4  | c.458G>C       | p.Arg153Thr   |
| F09       | B00647        | <i>BRCA1</i>  | NM_007294    | exon23 | c.5507_5508del | p.Glu1836fs   |
| F09       | B00649        | <i>FANCD2</i> | NM_001018115 | exon26 | c.2423T>G      | p.Met808Arg   |
| F09       | B00649        | <i>MSH6</i>   | NM_000179    | exon4  | c.1063G>A      | p.Gly355Ser   |
| F10       | B00627_190131 | <i>RAD51C</i> | NM_058216    | exon4  | c.635G>A       | p.Arg212His   |
| F10       | B00627_190131 | <i>BRCA2</i>  | NM_000059    | exon22 | c.8951C>G      | p.Ser2984Term |
| F10       | B00628_190131 | <i>TP53</i>   | NM_000546    | exon3  | c.91G>A        | p.Val31Ile    |
| F10       | B00628_190131 | <i>RAD51C</i> | NM_058216    | exon4  | c.635G>A       | p.Arg212His   |
| F10       | B00628_190131 | <i>BRCA2</i>  | NM_000059    | exon22 | c.8951C>G      | p.Ser2984Term |
| F10       | B00629_190131 | <i>RAD51C</i> | NM_058216    | exon4  | c.635G>A       | p.Arg212His   |
| F10       | B00629_190131 | <i>MLH1</i>   | NM_000249    | exon9  | c.704A>T       | p.Asp235Val   |
| F10       | B00629_190131 | <i>BRCA2</i>  | NM_000059    | exon22 | c.8951C>G      | p.Ser2984Term |
| F10       | B00630_190131 | <i>RAD51C</i> | NM_058216    | exon4  | c.635G>A       | p.Arg212His   |
| F10       | B00630_190131 | <i>BRCA2</i>  | NM_000059    | exon22 | c.8951C>G      | p.Ser2984Term |
| F10       | B00631_190131 | <i>NBN</i>    | NM_002485    | exon11 | c.1809C>A      | p.Phe603Leu   |
| F10       | B00631_190131 | <i>MLH1</i>   | NM_000249    | exon9  | c.704A>T       | p.Asp235Val   |
| F10       | B00632_190131 | <i>MLH1</i>   | NM_000249    | exon9  | c.704A>T       | p.Asp235Val   |
| F10       | B00632_190131 | <i>FANCI</i>  | NM_018193    | exon23 | c.2366C>T      | p.Ala789Val   |
| F10       | B00633_190131 | <i>TP53</i>   | NM_000546    | exon3  | c.91G>A        | p.Val31Ile    |
| F10       | B00633_190131 | <i>RAD51C</i> | NM_058216    | exon4  | c.635G>A       | p.Arg212His   |
| F10       | B00633_190131 | <i>BRCA2</i>  | NM_000059    | exon22 | c.8951C>G      | p.Ser2984Term |
| F10       | B00910        | <i>RAD51C</i> | NM_058216    | exon4  | c.635G>A       | p.Arg212His   |
| F10       | B00911        | <i>BRCA1</i>  | NM_007294    | exon10 | c.743delinsG   | p.Thr248Ser   |
| F10       | B00911        | <i>RAD51C</i> | NM_058216    | exon4  | c.635G>A       | p.Arg212His   |
| F10       | B00911        | <i>PMS2</i>   | NM_000535    | exon11 | c.1154_1156del | p.Ile385del   |
| F10       | B00912        | <i>RAD51C</i> | NM_058216    | exon4  | c.635G>A       | p.Arg212His   |
| F10       | B00912        | <i>APC</i>    | NM_000038    | exon16 | c.5081G>T      | p.Gly1694Val  |
| F11       | B00600        | <i>ATM</i>    | NM_000051    | exon57 | c.8393C>A      | p.Ala2798Asp  |
| F11       | B00601        | <i>ATM</i>    | NM_000051    | exon57 | c.8393C>A      | p.Ala2798Asp  |
| F11       | B00601        | <i>APC</i>    | NM_000038    | exon16 | c.8332G>T      | p.Ala2778Ser  |
| F11       | B00602        | <i>BLM</i>    | NM_000057    | exon5  | c.1044G>A      | p.Met348Ile   |
| F11       | B00607        | <i>FANCD2</i> | NM_001018115 | exon34 | c.3446C>T      | p.Ala1149Val  |
| F12       | B00719        | <i>PALB2</i>  | NM_024675    | exon4  | c.1492G>T      | p.Asp498Tyr   |
| F12       | B00719        | <i>APC</i>    | NM_000038    | exon16 | c.8291C>G      | p.Ser2764Cys  |

Table S2 Continued

| Family ID | Sample ID | Gene          | NM        | Exon   | Genome             | AA_change      |
|-----------|-----------|---------------|-----------|--------|--------------------|----------------|
| F13       | B00656    | <i>BRCA1</i>  | NM_007294 | exon10 | c.3916_3917del     | p.Leu1306fs    |
| F13       | B00656    | <i>MLH1</i>   | NM_000249 | exon8  | c.649C>T           | p.Arg217Cys    |
| F13       | B00656    | <i>BAP1</i>   | NM_004656 |        | IVS5-4C>T          |                |
| F13       | B00657    | <i>RAD50</i>  | NM_005732 | exon25 | c.3836G>A          | p.Arg1279His   |
| F13       | B00657    | <i>BRCA1</i>  | NM_007294 | exon10 | c.3916_3917del     | p.Leu1306fs    |
| F13       | B00657    | <i>BAP1</i>   | NM_004656 |        | IVS5-4C>T          |                |
| F13       | B00658    | <i>BRCA1</i>  | NM_007294 | exon10 | c.3916_3917del     | p.Leu1306fs    |
| F13       | B00658    | <i>RAD50</i>  | NM_005732 | exon25 | c.3836G>A          | p.Arg1279His   |
| F14       | B00688    | <i>EPCAM</i>  | NM_002354 | exon4  | c.458G>C           | p.Arg153Thr    |
| F14       | B00689    | <i>CDH1</i>   | NM_004360 | exon12 | c.1888C>G          | p.Leu630Val    |
| F14       | B00689    | <i>ATM</i>    | NM_000051 | exon3  | c.173A>G           | p.Asp58Gly     |
| F14       | B00689    | <i>RAD50</i>  | NM_005732 | exon3  | c.243G>C           | p.Gln81His     |
| F15       | B00710    | <i>BRCA2</i>  | NM_000059 | exon11 | c.5785A>G          | p.Ile1929Val   |
| F15       | B00710    | <i>ATM</i>    | NM_000051 | exon14 | c.2149C>T          | p.Arg717Trp    |
| F15       | B00710    | <i>BRIP1</i>  | NM_032043 | exon17 | c.2440C>T          | p.Arg814Cys    |
| F15       | B00711    | <i>BRCA1</i>  | NM_007294 | exon10 | c.3344_3346del     | p.1115_1116del |
| F15       | B00712    | <i>BRCA2</i>  | NM_000059 | exon18 | c.8187G>T          | p.Lys2729Asn   |
| F15       | B00713    | <i>BRIP1</i>  | NM_032043 | exon17 | c.2440C>T          | p.Arg814Cys    |
| F15       | B00714    | <i>ATM</i>    | NM_000051 | exon14 | c.2149C>T          | p.Arg717Trp    |
| F15       | B00714    | <i>MSH6</i>   | NM_000179 | exon10 | c.4065_4066insTTGA | p.Thr1355fs    |
| F16       | B00725    | <i>RAD51C</i> | NM_058216 | exon9  | c.1108C>T          | p.Arg370Term   |
| F16       | B00725    | <i>BRIP1</i>  | NM_032043 | exon7  | c.797C>T           | p.Thr266Met    |
| F16       | B00728    | <i>BRIP1</i>  | NM_032043 | exon7  | c.797C>T           | p.Thr266Met    |
| F16       | B00728    | <i>RAD51C</i> | NM_058216 | exon9  | c.1108C>T          | p.Arg370Term   |
| F16       | B00728    | <i>MLH1</i>   | NM_000249 | exon18 | c.2101C>A          | p.Gln701Lys    |
| F16       | B00728    | <i>NBN</i>    | NM_002485 | exon11 | c.1809C>A          | p.Phe603Leu    |
| F16       | B00728    | <i>MSH6</i>   | NM_000179 | exon10 | c.4065_4066insTTGA | p.Thr1355fs    |
| F16       | B00728    | <i>BARD1</i>  | NM_000465 | exon10 | c.1972C>T          | p.Arg658Cys    |
| F16       | B00729    | <i>MUTYH</i>  | NM_012222 | exon12 | c.1109C>T          | p.Ala370Val    |
| F16       | B00730    | <i>BRIP1</i>  | NM_032043 | exon7  | c.797C>T           | p.Thr266Met    |
| F16       | B00730    | <i>RAD51C</i> | NM_058216 | exon9  | c.1108C>T          | p.Arg370Term   |
| F16       | B00730    | <i>BARD1</i>  | NM_000465 | exon10 | c.1972C>T          | p.Arg658Cys    |
| F16       | B00731    | <i>BRCA1</i>  | NM_007294 |        | IVS2-5->G          |                |
| F16       | B00731    | <i>MSH6</i>   | NM_000179 | exon6  | c.3488A>T          | p.Glu1163Val   |
| F16       | B00731    | <i>MUTYH</i>  | NM_012222 | exon12 | c.1109C>T          | p.Ala370Val    |

Table S2 Continued

| Family ID | Sample ID     | Gene          | NM           | Exon   | Genome       | AA_change     |
|-----------|---------------|---------------|--------------|--------|--------------|---------------|
| F17       | B00733        | <i>CDH1</i>   | NM_004360    | exon12 | c.1888C>G    | p.Leu630Val   |
| F17       | B00734        | <i>MSH6</i>   | NM_000179    | exon1  | c.88G>A      | p.Glu30Lys    |
| F18       | B00745        | <i>RET</i>    | NM_020975    | exon11 | c.1894G>A    | p.Glu632Lys   |
| F18       | B00745        | <i>EPCAM</i>  | NM_002354    | exon3  | c.233T>G     | p.Leu78Arg    |
| F18       | B00746        | <i>RET</i>    | NM_020975    | exon11 | c.1894G>A    | p.Glu632Lys   |
| F18       | B00746        | <i>EPCAM</i>  | NM_002354    | exon3  | c.233T>G     | p.Leu78Arg    |
| F18       | B00746        | <i>BRIP1</i>  | NM_032043    | exon5  | c.430G>A     | p.Ala144Thr   |
| F19       | B00739        | <i>MSH2</i>   | NM_000251    | exon3  | c.505A>G     | p.Ile169Val   |
| F19       | B00739        | <i>RAD50</i>  | NM_005732    | exon3  | c.323A>G     | p.Lys108Arg   |
| F19       | B00739        | <i>FANCD2</i> | NM_001018115 | exon34 | c.3446C>T    | p.Ala1149Val  |
| F19       | B00741        | <i>FANCD2</i> | NM_001018115 | exon34 | c.3446C>T    | p.Ala1149Val  |
| F19       | B00742        | <i>MSH2</i>   | NM_000251    | exon3  | c.505A>G     | p.Ile169Val   |
| F20       | B00619_190228 | <i>MSH6</i>   | NM_000179    | exon4  | c.2028A>T    | p.Lys676Asn   |
| F20       | B00619_190228 | <i>MLH1</i>   | NM_000249    | exon18 | c.2101C>A    | p.Gln701Lys   |
| F22       | B00603        | <i>BRCA1</i>  | NM_007294    | exon10 | c.981_982del | p.Thr327fs    |
| F22       | B00604        | <i>MSH2</i>   | NM_000251    | exon1  | c.23C>T      | p.Thr8Met     |
| F22       | B00604        | <i>ATM</i>    | NM_000051    | exon50 | c.7382G>A    | p.Arg2461His  |
| F23       | B00789_190228 | <i>BRCA2</i>  | NM_000059    | exon15 | c.7558C>T    | p.Arg2520Term |
| F23       | B00789_190228 | <i>CHEK2</i>  | NM_001005735 | exon14 | c.1567G>A    | p.Ala523Thr   |
| F23       | B00790_190228 | <i>BRCA2</i>  | NM_000059    | exon15 | c.7558C>T    | p.Arg2520Term |
| F23       | B00790_190228 | <i>CHEK2</i>  | NM_001005735 | exon14 | c.1567G>A    | p.Ala523Thr   |
| F23       | B00791_190228 | <i>BRCA2</i>  | NM_000059    | exon15 | c.7558C>T    | p.Arg2520Term |
| F23       | B00791_190228 | <i>CHEK2</i>  | NM_001005735 | exon14 | c.1567G>A    | p.Ala523Thr   |
| F23       | B00792_190228 | <i>BRCA2</i>  | NM_000059    | exon15 | c.7558C>T    | p.Arg2520Term |
| F23       | B00792_190228 | <i>CHEK2</i>  | NM_001005735 | exon14 | c.1567G>A    | p.Ala523Thr   |
| F23       | B00793_190228 | <i>CHEK2</i>  | NM_001005735 | exon14 | c.1567G>A    | p.Ala523Thr   |
| F23       | B00793_190228 | <i>BRCA2</i>  | NM_000059    | exon15 | c.7558C>T    | p.Arg2520Term |
| F24       | B00803_190313 | <i>BLM</i>    | NM_000057    | exon14 | c.2744C>T    | p.Ala915Val   |
| F24       | B00803_190313 | <i>MRE11A</i> | NM_005591    | exon6  | c.469A>G     | p.Met157Val   |
| F24       | B00804_190313 | <i>MRE11A</i> | NM_005591    | exon6  | c.469A>G     | p.Met157Val   |
| F24       | B00804_190313 | <i>RAD50</i>  | NM_005732    |        | IVS15+4A>T   |               |
| F24       | B00806_190313 | <i>RAD50</i>  | NM_005732    |        | IVS15+4A>T   |               |
| F25       | B00810_190403 | <i>BRCA2</i>  | NM_000059    | exon24 | c.9160delC   | p.Pro3054fs   |
| F25       | B00810_190403 | <i>NBN</i>    | NM_002485    | exon5  | c.511A>G     | p.Ile171Val   |
| F25       | B00811_190403 | <i>BRCA1</i>  | NM_007294    | exon10 | c.4046C>T    | p.Thr1349Met  |

Table S2 Continued

| Family ID | Sample ID     | Gene          | NM        | Exon   | Genome         | AA_change    |
|-----------|---------------|---------------|-----------|--------|----------------|--------------|
| F25       | B00812_190403 | <i>BRCA1</i>  | NM_007294 | exon10 | c.4046C>T      | p.Thr1349Met |
| F25       | B00813_190403 | <i>RAD51C</i> | NM_058216 | exon1  | c.34C>T        | p.Arg12Trp   |
| F25       | B00813_190403 | <i>BRCA1</i>  | NM_007294 | exon10 | c.4046C>T      | p.Thr1349Met |
| F27       | B00835_190425 | <i>BRCA2</i>  | NM_000059 | exon11 | c.5785A>G      | p.Ile1929Val |
| F27       | B00835_190425 | <i>MLH1</i>   | NM_000249 | exon8  | c.649C>T       | p.Arg217Cys  |
| F27       | B00835_190425 | <i>MSH2</i>   | NM_000251 | exon3  | c.505A>G       | p.Ile169Val  |
| F27       | B00835_190425 | <i>BLM</i>    | NM_000057 | exon17 | c.3349dupA     | p.Asp1116fs  |
| F27       | B00836_190425 | <i>BRCA2</i>  | NM_000059 | exon11 | c.5785A>G      | p.Ile1929Val |
| F27       | B00836_190425 | <i>BLM</i>    | NM_000057 | exon17 | c.3349dupA     | p.Asp1116fs  |
| F27       | B00839_190425 | <i>MSH2</i>   | NM_000251 | exon3  | c.505A>G       | p.Ile169Val  |
| F27       | B00839_190425 | <i>BRCA2</i>  | NM_000059 | exon11 | c.5785A>G      | p.Ile1929Val |
| F27       | B00839_190425 | <i>BLM</i>    | NM_000057 | exon17 | c.3349dupA     | p.Asp1116fs  |
| F28       | B00875        | <i>BRCA1</i>  | NM_007294 | exon10 | c.3448C>T      | p.Pro1150Ser |
| F28       | B00875        | <i>MSH2</i>   | NM_000251 | exon13 | c.2055A>G      | p.Ile685Met  |
| F28       | B00876        | <i>BRCA1</i>  | NM_007294 | exon10 | c.3448C>T      | p.Pro1150Ser |
| F28       | B00878        | <i>BRCA1</i>  | NM_007294 | exon10 | c.4084_4085del | p.Asp1362fs  |
| F28       | B00878        | <i>BRCA1</i>  | NM_007294 | exon10 | c.3448C>T      | p.Pro1150Ser |
| F28       | B00879        | <i>BRCA1</i>  | NM_007294 | exon10 | c.3448C>T      | p.Pro1150Ser |
| F28       | B00880        | <i>BRCA1</i>  | NM_007294 | exon10 | c.3448C>T      | p.Pro1150Ser |
| F28       | B00887        | <i>MSH2</i>   | NM_000251 | exon13 | c.2055A>G      | p.Ile685Met  |
| F28       | B00888        | <i>BRCA1</i>  | NM_007294 | exon10 | c.4084_4085del | p.Asp1362fs  |
| F28       | B00888        | <i>MSH2</i>   | NM_000251 | exon13 | c.2055A>G      | p.Ile685Met  |
| F28       | B00889        | <i>BRCA1</i>  | NM_007294 | exon10 | c.4084_4085del | p.Asp1362fs  |
| F28       | B00889        | <i>MSH2</i>   | NM_000251 | exon13 | c.2055A>G      | p.Ile685Met  |
| F29       | B00883        | <i>RAD50</i>  | NM_005732 | exon21 | c.3310T>C      | p.Tyr1104His |
| F29       | B00884        | <i>MSH6</i>   | NM_000179 | exon4  | c.2522delG     | p.Arg841fs   |
| F29       | B00884        | <i>RAD50</i>  | NM_005732 | exon21 | c.3310T>C      | p.Tyr1104His |
| F29       | B00905        | <i>MSH6</i>   | NM_000179 | exon4  | c.2522delG     | p.Arg841fs   |
| F29       | B00905        | <i>RAD50</i>  | NM_005732 | exon21 | c.3310T>C      | p.Tyr1104His |
